# Supplementary material for: Deletion of Stk11 and Fos in mouse BLA projection neurons alters intrinsic excitability and impairs formation of long-term aversive memory
Source: eLife journal article supplement (doi:10.7554/elife.61036), 2020-08-11
Supplement: supp [file elife-61036-supp-v1.zip]

Archive with 25 entries (25 files):
- elife_poa_e61036_Transparent_Reporting_File.pdf
- elife_poa_e61036_Figure_1_figure_supplement_1.pdf
- elife_poa_e61036_Figure_2_figure_supplement_1.pdf
- elife_poa_e61036_Figure_2_figure_supplement_2.pdf
- elife_poa_e61036_Figure_2_figure_supplement_3.pdf
- elife_poa_e61036_Figure_2_figure_supplement_4.pdf
- elife_poa_e61036_Figure_4_figure_supplement_1.pdf
- elife_poa_e61036_Figure_5_figure_supplement_1.pdf
- elife_poa_e61036_Figure_8_figure_supplement_1.pdf
- elife_poa_e61036_Figure_5_figure_supplement_1_source_data_2.docx
- elife_poa_e61036_Figure_5_figure_supplement_1_source_data_1.docx
- elife_poa_e61036_Figure_2_figure_supplement_2_source_data_1.docx
- elife_poa_e61036_Figure_2_figure_supplement_1_source_data_2.docx
- elife_poa_e61036_Figure_2_figure_supplement_1_source_data_1.docx
- elife_poa_e61036_Figure_8_source_data_1.docx
- elife_poa_e61036_Figure_8_source_data_2.docx
- elife_poa_e61036_Figure_4_source_data_4.docx
- elife_poa_e61036_Figure_4_source_data_3.docx
- elife_poa_e61036_Figure_4_source_data_2.docx
- elife_poa_e61036_Figure_4_source_data_1.docx
- elife_poa_e61036_Figure_3_source_data_2.docx
- elife_poa_e61036_Figure_3_source_data_1.docx
- elife_poa_e61036_Figure_2_source_data_1.docx
- elife_poa_e61036_Figure_1_source_data_2.docx
- elife_poa_e61036_Figure_1_source_data_1.docx
