# Supplementary material for: Deletion of Stk11 and Fos in mouse BLA projection neurons alters intrinsic excitability and impairs formation of long-term aversive memory
Source: eLife journal article supplement (doi:10.7554/elife.61036), 2020-08-11
Supplement: supp [file elife-61036-supp-v1.zip › elife_poa_e61036_Figure_2_figure_supplement_1_source_data_2.docx]

|  | Fos protein in | | |
| --- | --- | --- | --- |
|  | BLA YFPH+ neurons | | |
|  | CTA |  | LiCl Control |
| 1 | 26 | 1 | 6 |
| 2 | 20 | 2 | 8 |
| 3 | 11 | 3 | 6 |
| 4 | 25 | 4 | 0 |

**Figure 2-Figure supplement 1-Source data 2.** FOS protein counts in BLA YFPH+ neurons 4 hours following CTA training and LiCl control. This data relates Figure 2-Figure supplement 1 panel C.
