# Supplementary material for: Deletion of Stk11 and Fos in mouse BLA projection neurons alters intrinsic excitability and impairs formation of long-term aversive memory
Source: eLife journal article supplement (doi:10.7554/elife.61036), 2020-08-11
Supplement: supp [file elife-61036-supp-v1.zip › elife_poa_e61036_Figure_2_figure_supplement_2_source_data_1.docx]

|  | CTA |  | Control |
| --- | --- | --- | --- |
| 1 | 253.4697 | 1 | 85.33251 |
| 2 | 349.8284 | 2 | 125.0663 |
| 3 | 163.5381 | 3 | 89.60124 |
| 4 | 228.7906 | 4 | 132.1286 |
| 5 | 69.1447 | 5 | 22.60647 |
| 6 | 80.44415 | 6 | 145.2649 |
| 7 | 132.1266 | 7 | 100 |
| 8 | 111.1281 | 8 | 100 |
| 9 | 242.0937 |  |  |

**Figure 2-Figure supplement 2-Source data 1.** STK11 protein levels in the BLA 4 hours following CTA training or taste control. This data relates Figure 2-Figure supplement 2.
