# Supplementary material for: Deletion of Stk11 and Fos in mouse BLA projection neurons alters intrinsic excitability and impairs formation of long-term aversive memory
Source: eLife journal article supplement (doi:10.7554/elife.61036), 2020-08-11
Supplement: supp [file elife-61036-supp-v1.zip › elife_poa_e61036_Figure_4_source_data_1.docx]

|  | GFP injected |  |  | Cre injected | |
| --- | --- | --- | --- | --- | --- |
|  | CTA_training | CTA_test |  | CTA_training | CTA_test |
| 1 | 0.8 | 0.2 | 1 | 1.1 | 0.9 |
| 2 | 1 | 0.5 | 2 | 0.8 | 0.6 |
| 3 | 1.1 | 0.1 | 3 | 0.9 | 0.9 |
| 4 | 0.4 | 0.2 | 4 | 1 | 0.9 |
| 5 | 0.8 | 0.3 | 5 | 1 | 0.8 |
| 6 | 0.7 | 0.2 | 6 | 1 | 0.8 |
|  |  |  | 7 | 0.9 | 0.4 |

**Figure 4-Source data 1.** Saccharin consumption (ml) during CTA training and test. This data relates to Figure 4 panel A.
