# Supplementary material for: Deletion of Stk11 and Fos in mouse BLA projection neurons alters intrinsic excitability and impairs formation of long-term aversive memory
Source: eLife journal article supplement (doi:10.7554/elife.61036), 2020-08-11

# Figure 5-figure supplement 1

A) *Stk11 f/f* mice  
BLA injection (AAV-Cre/GFP) → 10 days → CTA → 4 hours → Imaging

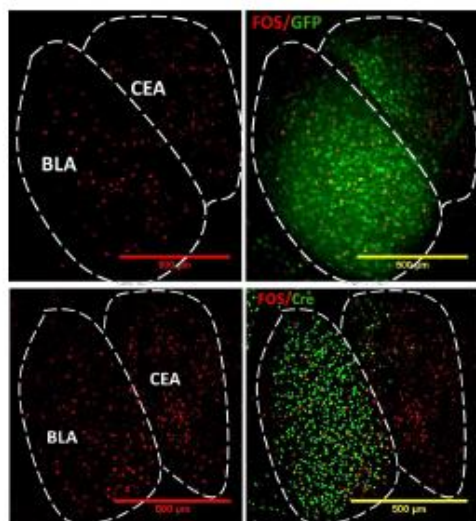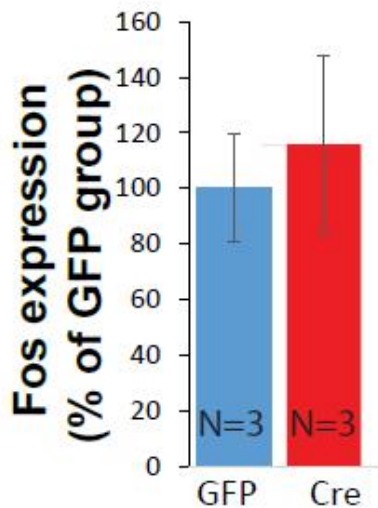

B) *Fos f/f* mice  
BLA injection (AAV-Cre/GFP) → 10 days → CTA → 4 hours → Imaging

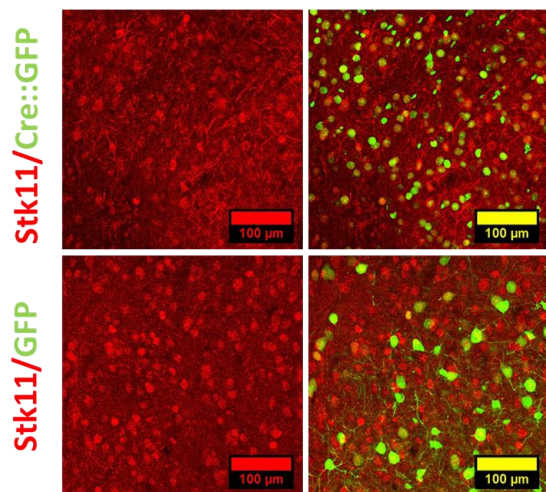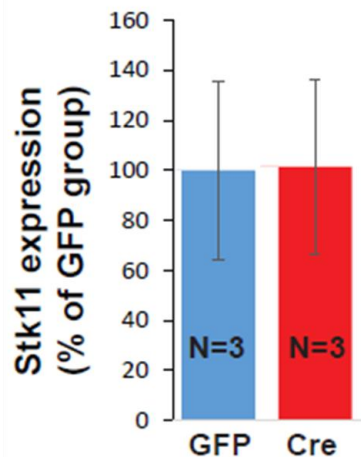

Supplement: supp [file elife-61036-supp-v1.zip › elife_poa_e61036_Figure_5_figure_supplement_1.pdf]
