# Supplementary material for: Deletion of Stk11 and Fos in mouse BLA projection neurons alters intrinsic excitability and impairs formation of long-term aversive memory
Source: eLife journal article supplement (doi:10.7554/elife.61036), 2020-08-11
Supplement: supp [file elife-61036-supp-v1.zip › elife_poa_e61036_Figure_5_figure_supplement_1_source_data_1.docx]

|  | Stk11 f/f mice | |
| --- | --- | --- |
|  | GFP | Cre |
| 1 | 138.5198 | 179.016 |
| 2 | 78.21699 | 87.04794 |
| 3 | 83.26325 | 81.3709 |

**Figure 5-Figure supplement 1-Source data 1.** *Stk11* deletion in BLApn does not change C-FOS expression. This data relates to Figure 5-Figure supplement 1 panel A.
