# Supplementary material for: Deletion of Stk11 and Fos in mouse BLA projection neurons alters intrinsic excitability and impairs formation of long-term aversive memory
Source: eLife journal article supplement (doi:10.7554/elife.61036), 2020-08-11

BLA injection (AAV-hM3Dq)  $\xrightarrow{10 \text{ days}}$  Slice preparation  $\xrightarrow{\text{CNO treatment}}$  (BLAp recording)

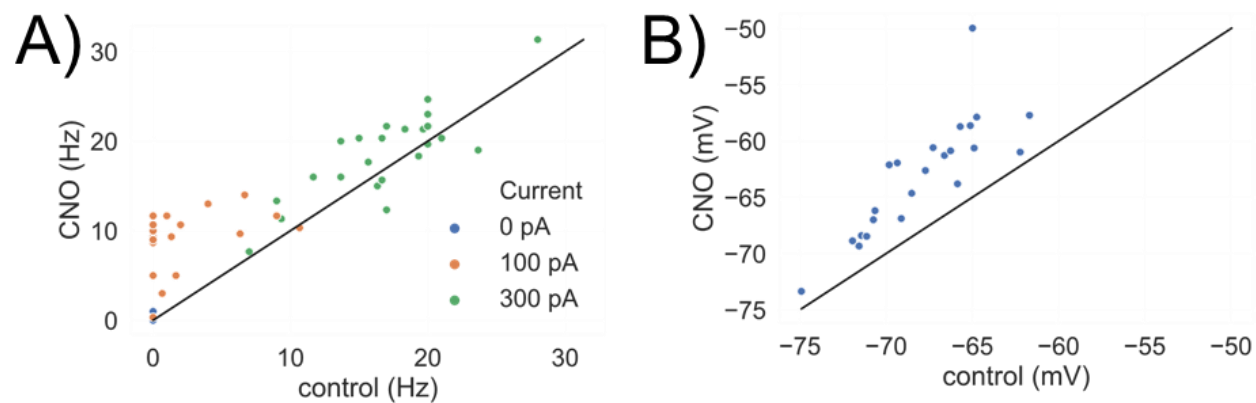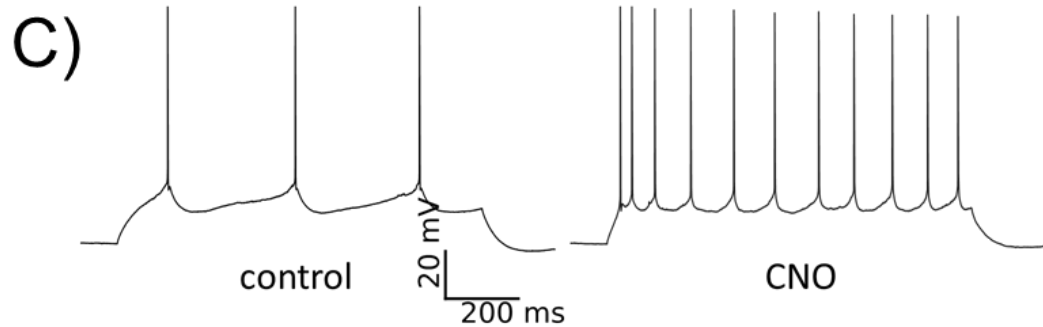

BLA injection (AAV-hM3Dq/GFP)  $\xrightarrow{10 \text{ days}}$  CNO (I.P injection)  $\xrightarrow{90 \text{ min}}$  BLA Imaging

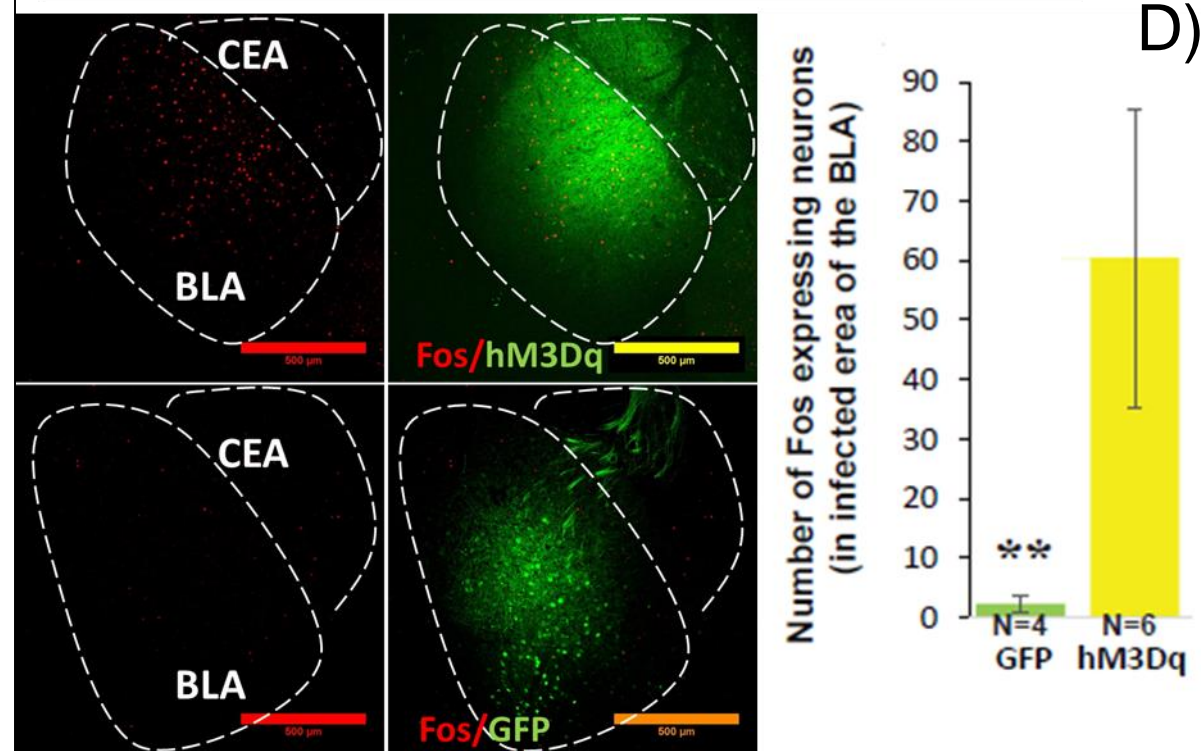

Supplement: supp [file elife-61036-supp-v1.zip › elife_poa_e61036_Figure_8_figure_supplement_1.pdf]
