# Supplementary figures and images for: Deletion of Stk11 and Fos in mouse BLA projection neurons alters intrinsic excitability and impairs formation of long-term aversive memory
Source: eLife journal article supplement (doi:10.7554/elife.61036), 2020-08-11

Figure 1-figure supplement 1

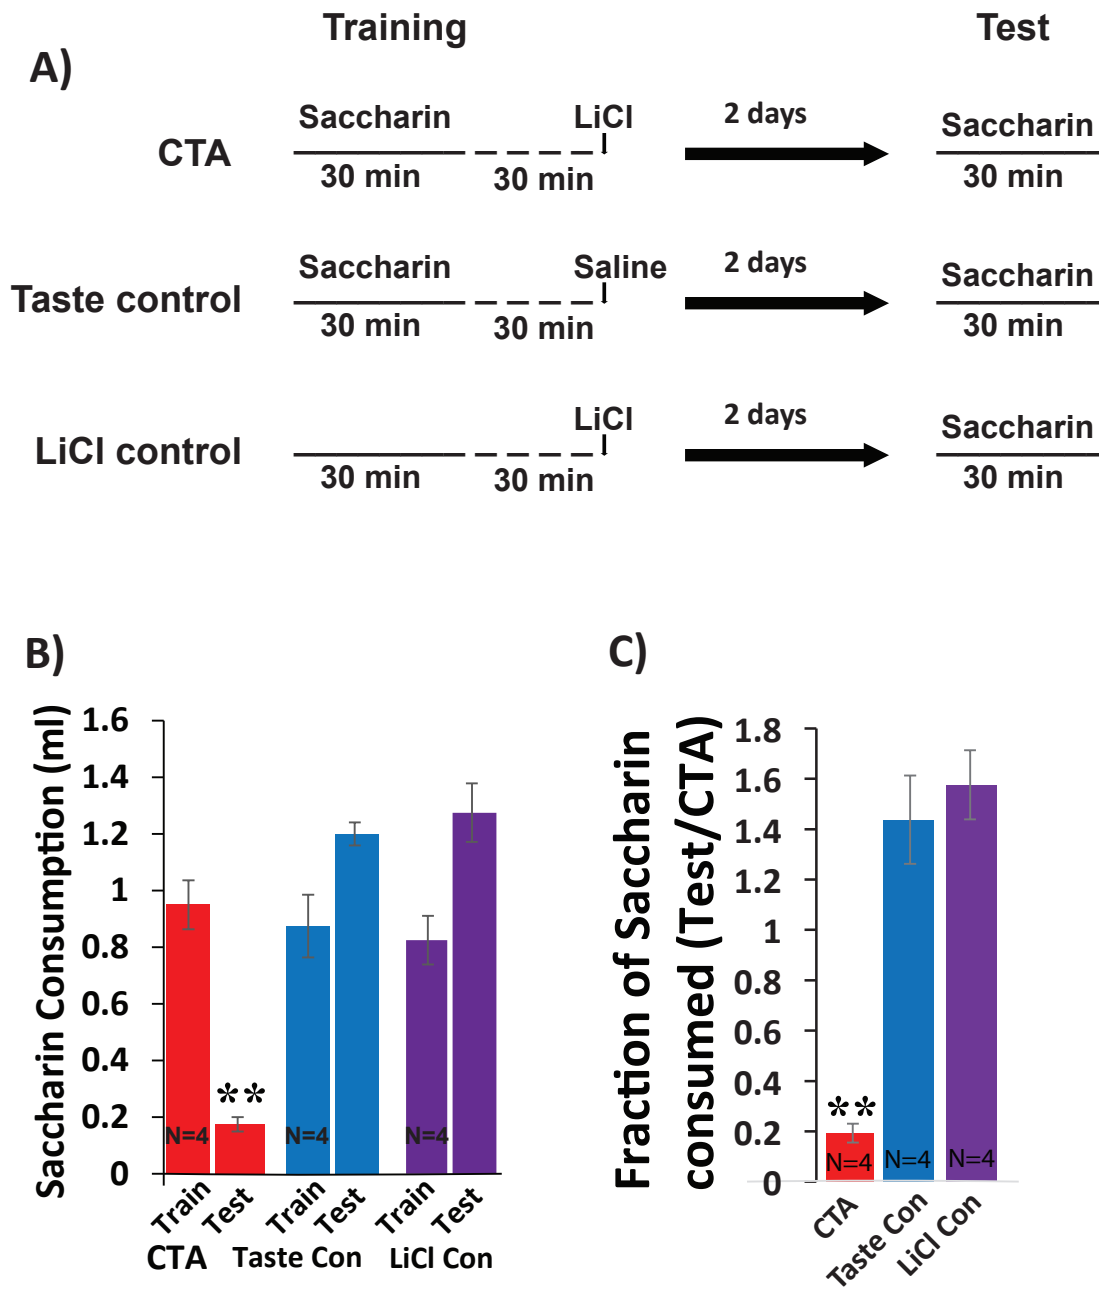

Supplement: supp [file elife-61036-supp-v1.zip › elife_poa_e61036_Figure_1_figure_supplement_1.pdf]

Figure 2-figure supplement 1.

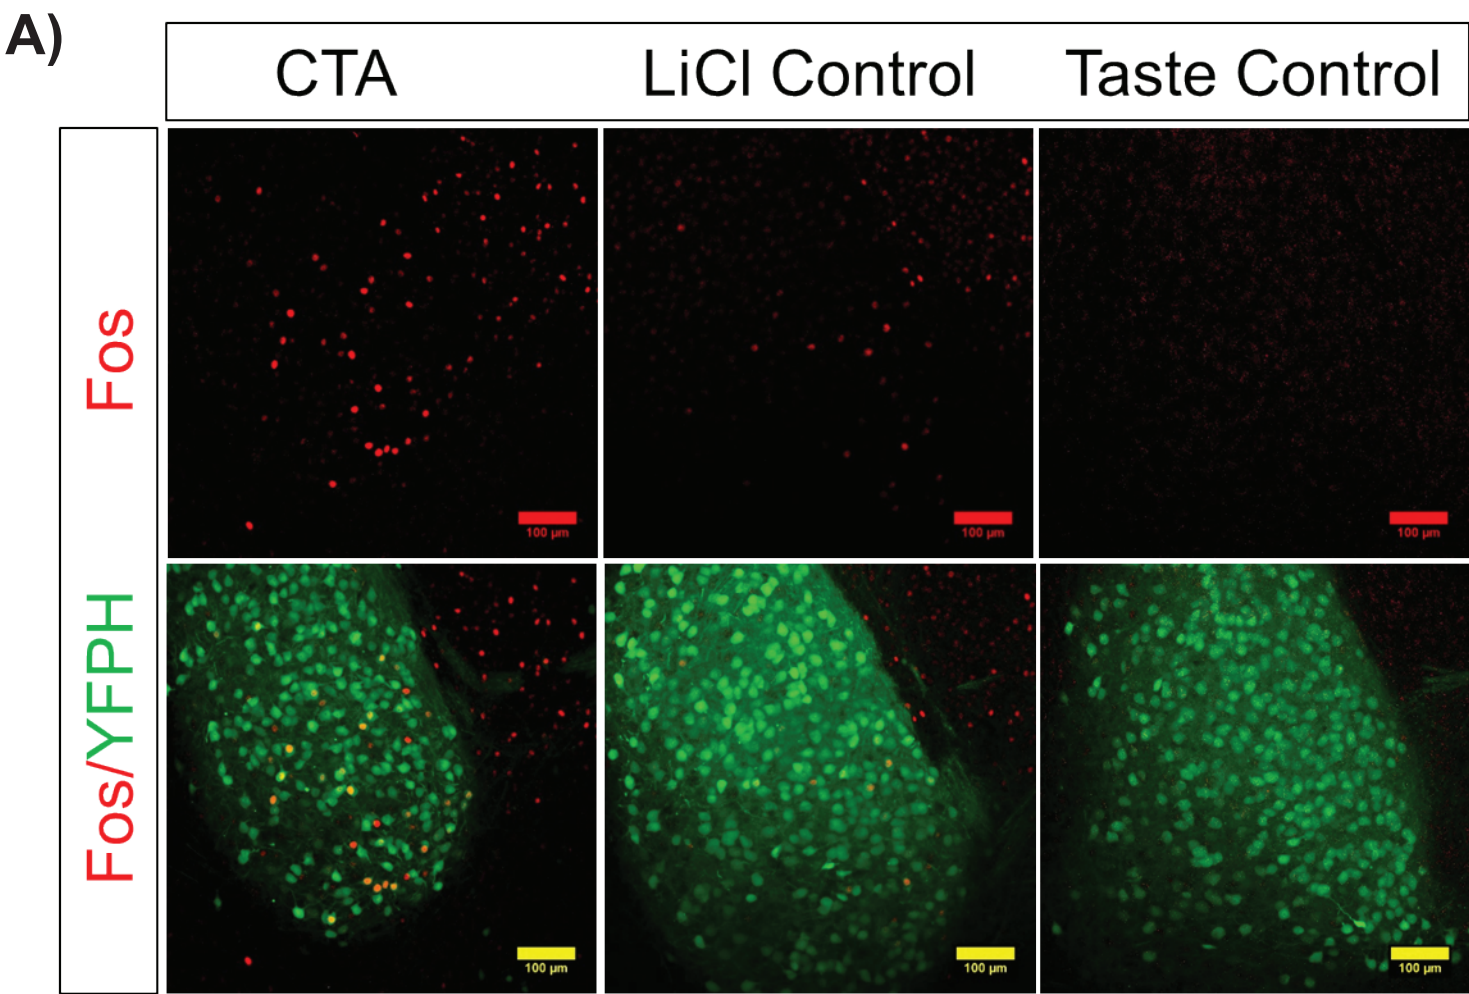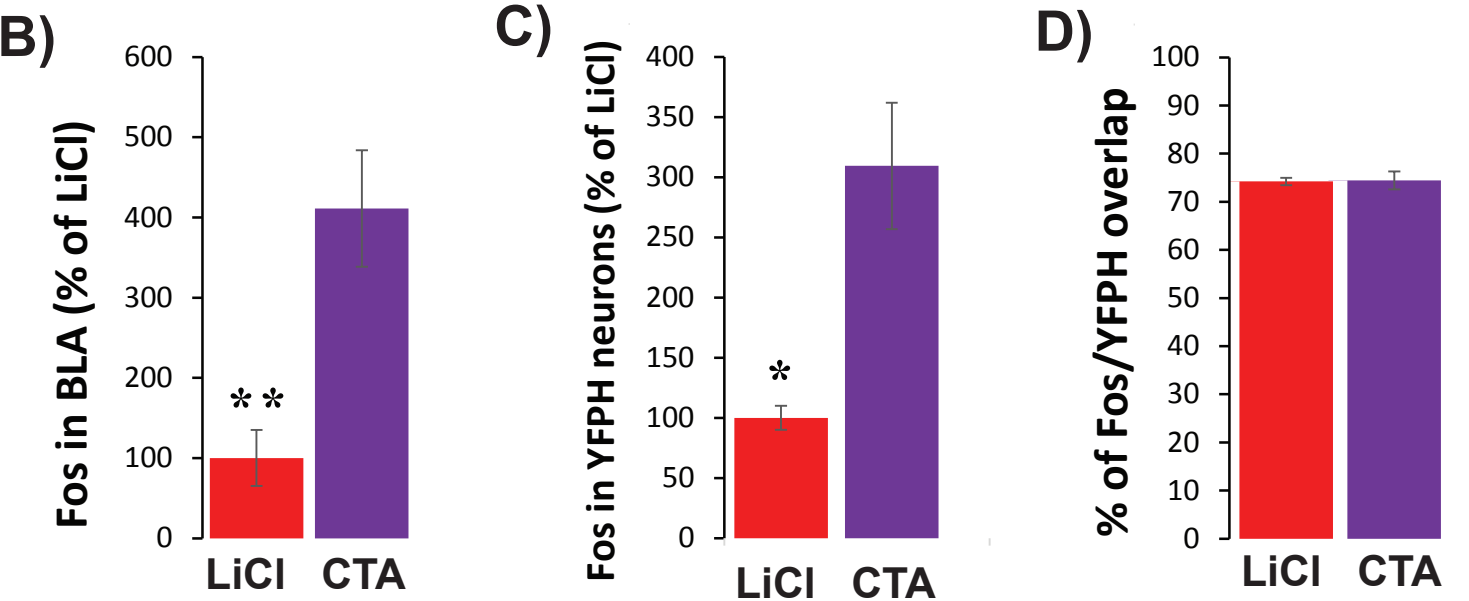

Supplement: supp [file elife-61036-supp-v1.zip › elife_poa_e61036_Figure_2_figure_supplement_1.pdf]

Figure 2-figure supplement 2.

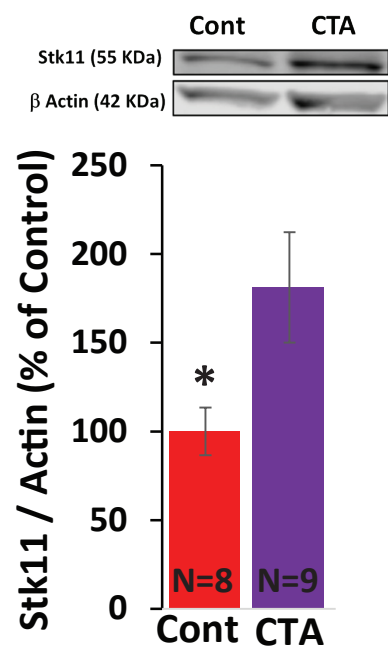

Supplement: supp [file elife-61036-supp-v1.zip › elife_poa_e61036_Figure_2_figure_supplement_2.pdf]

Figure 2-figure supplement 3.

A)

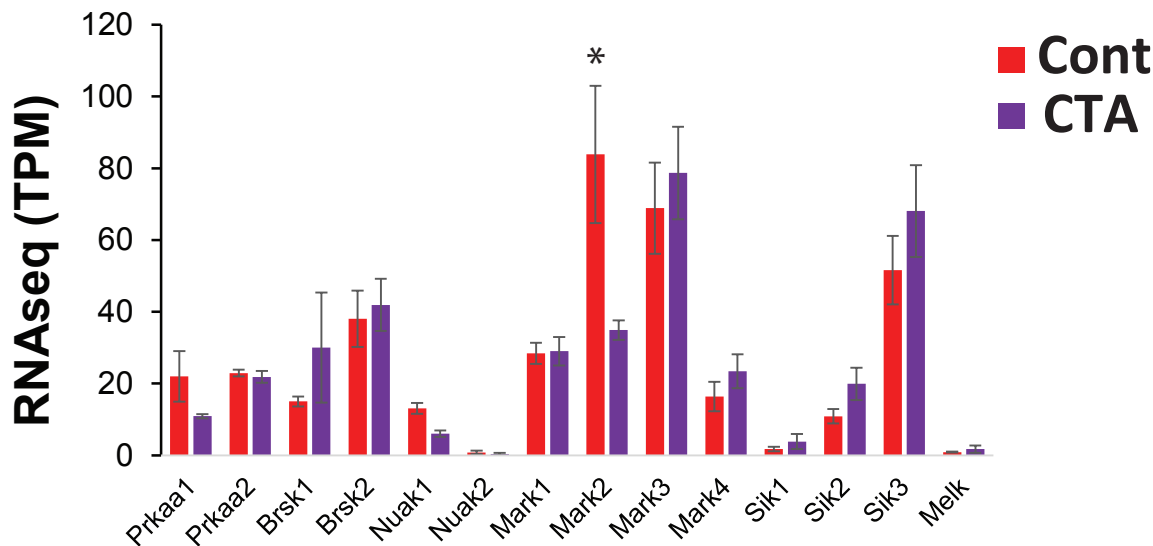

B)

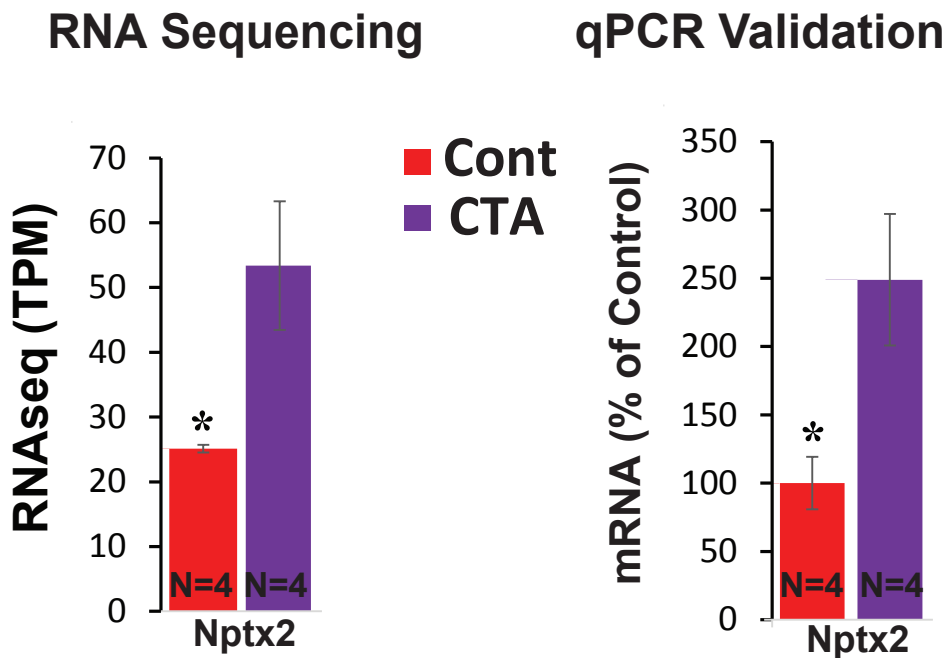

Supplement: supp [file elife-61036-supp-v1.zip › elife_poa_e61036_Figure_2_figure_supplement_3.pdf]

Figure 2-figure supplement 4

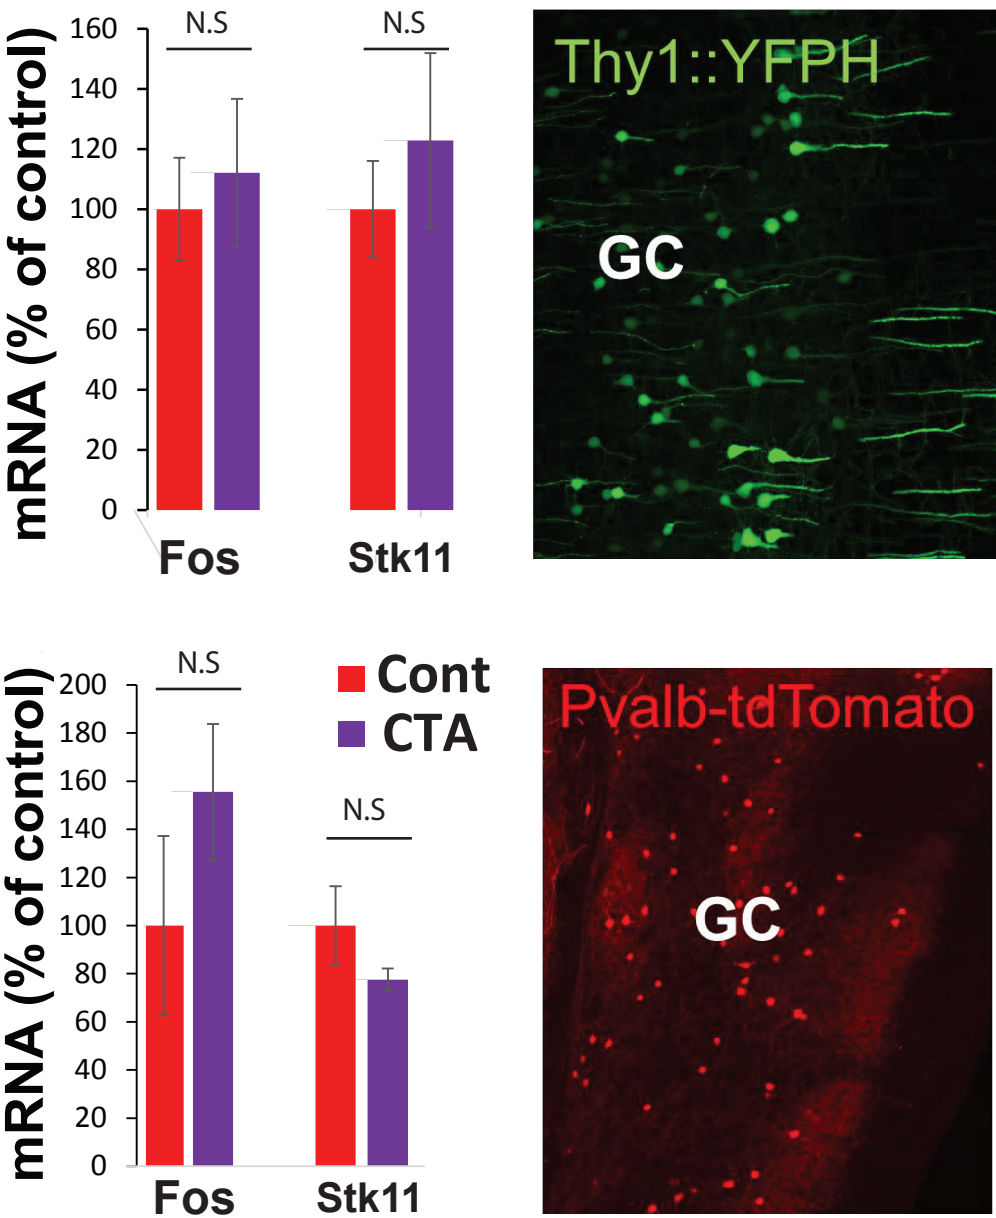

Supplement: supp [file elife-61036-supp-v1.zip › elife_poa_e61036_Figure_2_figure_supplement_4.pdf]

Figure 4-figure supplement 1.

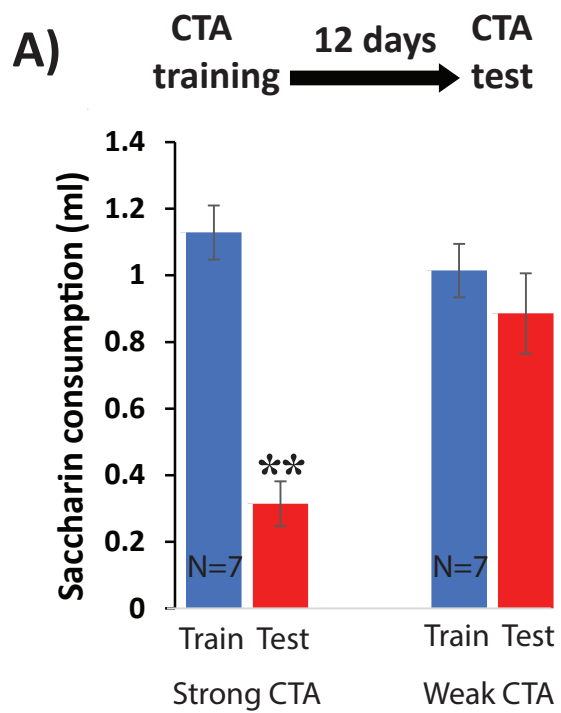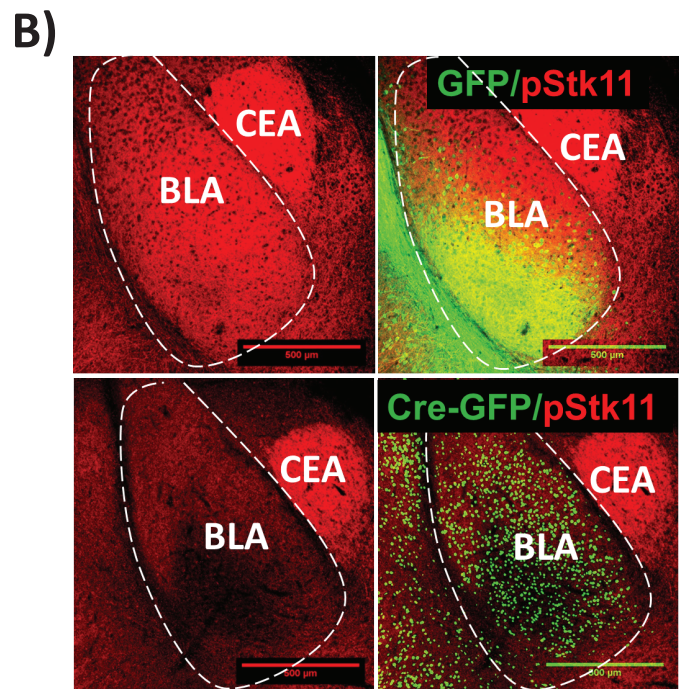

Supplement: supp [file elife-61036-supp-v1.zip › elife_poa_e61036_Figure_4_figure_supplement_1.pdf]
